# Supplementary material for: lncRNA HotairM1 Depletion Promotes Self-Renewal of Cancer Stem Cells through HOXA1-Nanog Regulation Loop
Source: PubMed Central journal article supplement — Mol Ther Nucleic Acids. 2020 Sep 16;22:456–70. doi: 10.1016/j.omtn.2020.09.008 (PMC7554324; doi:10.1016/j.omtn.2020.09.008), 2020-09-16
Supplement: mmc1.pdf [file mmc1.pdf]

## **Supplemental Information**

### **lncRNA HotairM1 Depletion Promotes Self-Renewal of Cancer Stem Cells through HOXA1-Nanog Regulation Loop**

**Fang Li, Yangfan Xu, Xiaofang Xu, Shengfang Ge, Feifei Zhang, He Zhang, and Xianqun Fan**

## Supplemental Information

### LncRNA HotairM1 Depletion Promotes Self-Renewal of Cancer Stem Cells through HOXA1-Nanog regulation loop

Fang Li<sup>1,2,\*</sup>, Yangfan Xu<sup>1,2,\*</sup>, Xiaofang Xu<sup>1,2,\*</sup>, Shengfang Ge<sup>1,2</sup>, Feifei Zhang<sup>1,2,#</sup>, He Zhang<sup>1,2,3,#</sup>, Xianqun Fan<sup>1,2,#</sup>

Table S1: Primers used in this research.

|                 |                         |
|-----------------|-------------------------|
| GAPDH-F         | AAGAAACCCTGGATTATTTAGC  |
| GAPDH-R         | TGGTATTCGAGAGAAGGGAGGG  |
| HotairM1-F      | GCCAGAAACCAGCCATAGTCCC  |
| HotairM1-R      | TTTGCTCCCTACCTTCCCTCGC  |
| HOXA1-F         | TCCTGGAATACCCCATACTTAGC |
| HOXA1-R         | GCACGACTGGAAAGTTGTAATCC |
| siControl-F     | UUCUCCGAACGUGUCACGU     |
| siControl-R     | ACGUGACACGUUCGGAGAA     |
| siHOXA1-F       | GCAGCUCAACGAGACCCAA     |
| siHOXA1-R       | UUGGGUCUCGUUGAGCUGC     |
| Chip-HOXA1P1-F  | AAATGCCACTAAAACGGTGATC  |
| Chip-HOXA1P1-R  | TCTTGCATTGTCCATCTGTCA   |
| Chip-HOXA1P2-F  | CTCGCCAGTTCATCTTTCATT   |
| Chip-HOXA1P2-R  | CCTCCTGCAAAAGTTTGCC     |
| Chip-HOXA1P3-F  | CGCTCTTCCCCCTCCATT      |
| Chip-HOXA1P3-R  | ACCGTTCAATGAAAGATGAACTG |
| Chip-HOXA1P4-F  | CCCGGTGCAAAACTGAGT      |
| Chip-HOXA1P4-R  | AATGGAGGGGGAAGAGCG      |
| Chip-HOXA1NC-F  | CTGAAAGAGGCGTTTTGAGC    |
| Chip-HOXA1NC-R  | GGAGCTGGTCTCTTTCAACG    |
| Chop-HotairM1-1 | GAGCGCCGGGGATTAAAAA     |
| Chop-HotairM1-3 | TCGTCCTACGCTCATAAATC    |
| Chop-HotairM1-5 | GCGGGTTGATTAAAGAACCT    |
| Chop-HotairM1-7 | TAATAAGCTACCAGTCTCCA    |

|                 |                      |
|-----------------|----------------------|
| Chop-HotairM1-9 | CGGCATGTTCAAAGTCTTCA |
| Chop-HotairM1-2 | AGAACGCAGCTTTTGCTCTT |
| Chop-HotairM1-4 | CTTCCTCCGCTAAATCTCAG |
| Chop-HotairM1-6 | AAATCCCTCCACATTTTCAG |
| Chop-HotairM1-8 | GGACAGTCTAAGATTTGGGC |

Figures

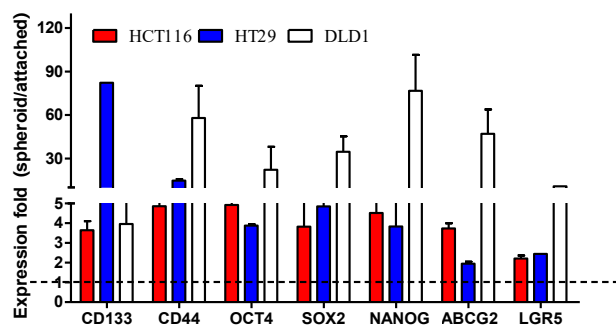

Figure S1: Expression of stem-related genes was much higher in cells enriched in serum-free medium than that in attached cells.

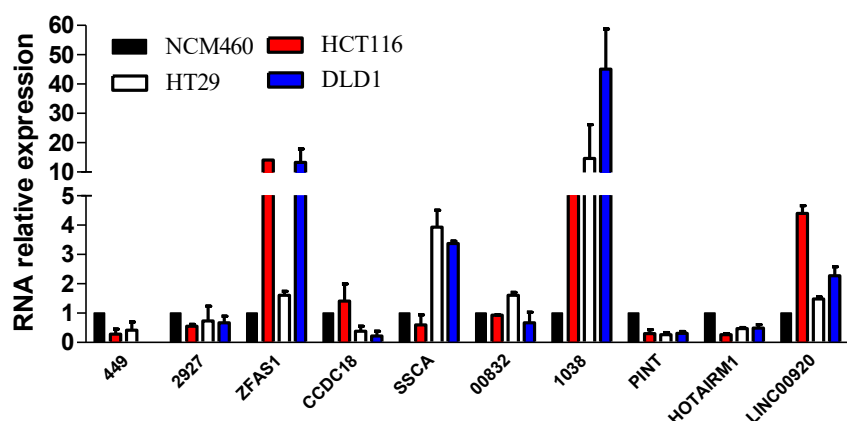

Figure S2: Several lncRNAs expression were detected in CSC and non-CSC subsets.

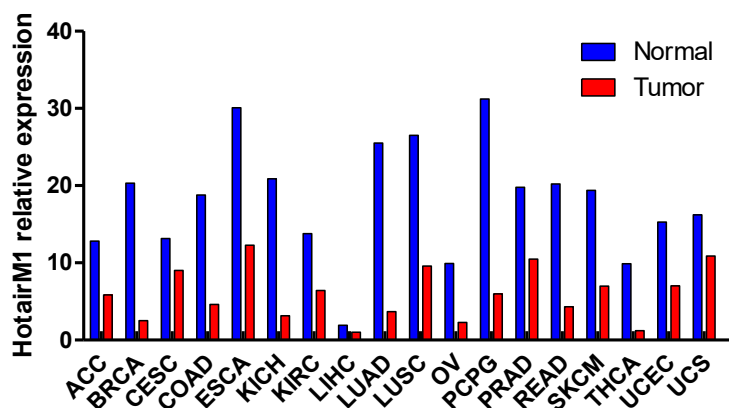

Figure S3: HotairM1 expression in different tumors according to the cosmic database.

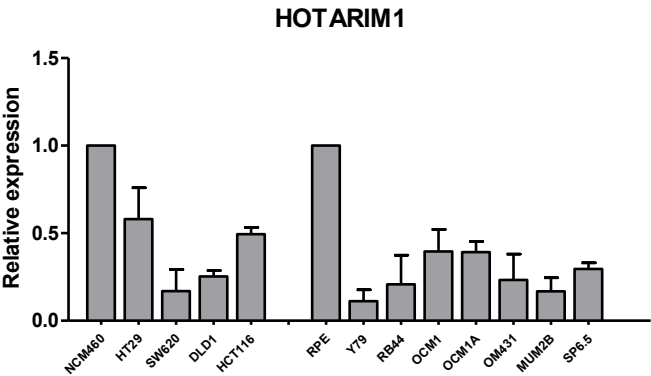

Figure S4: HotairM1 expression in normal colon cell line and colorectal cancer cell lines, and in normal cell line RPE and ocular tumor cell lines.

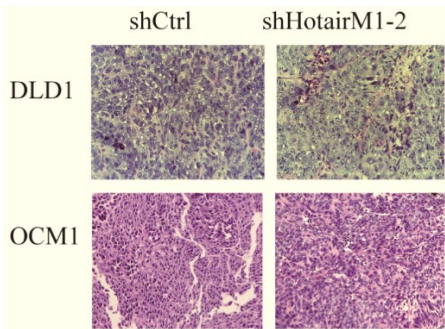

Figure S5: Representative hematoxylin and eosin (HE) staining images of tumors in different groups are shown.

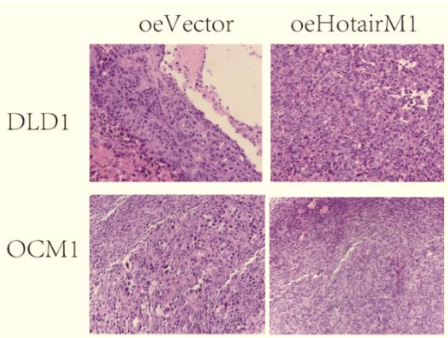

Figure S6: Representative HE staining images of HotairM1-overexpressing or oeVector tumors derived from cells injected subcutaneously into BALB/c nude mice.

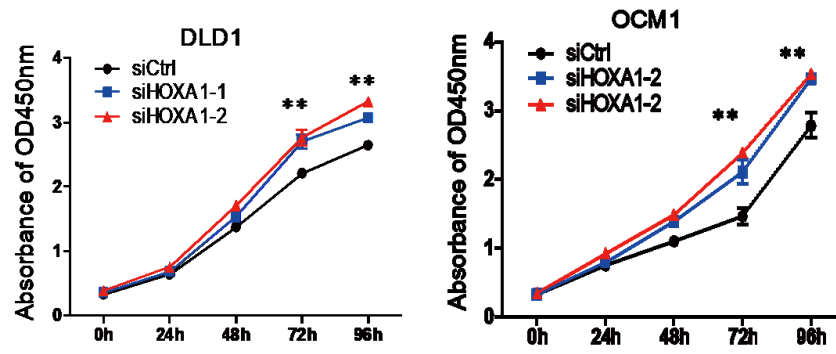

Figure S7: The proliferation ability of HOXA1-silenced and control tumor cells was analyzed using CCK8 assay. OD450 nm value was recorded and the growth index was analyzed.

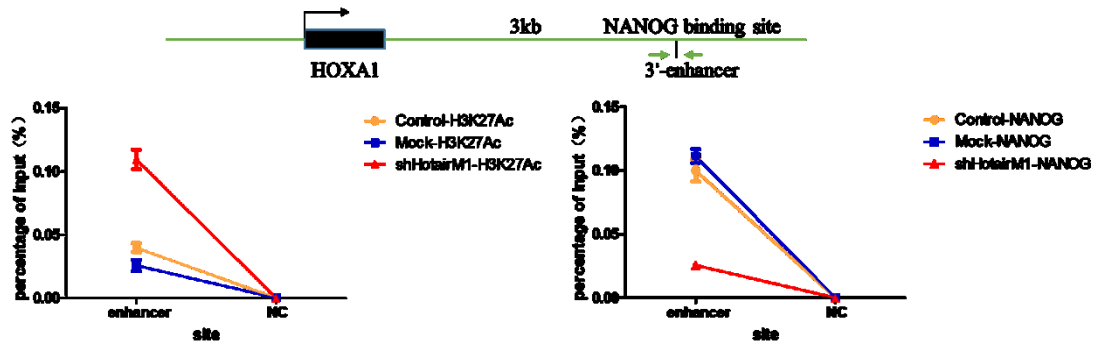

Figure S8: Nanog expression conversely could bind at the HOXA1 enhancer site and inhibit the acetylation of H3K27, thus further inhibiting HOXA1 expression.
